# Supplementary material
Source: PubMed Central journal article supplement (PMC4702555)
Supplement: JVI.02331-15_zjv999091121so1.pdf [file JVI.02331-15_zjv999091121so1.pdf]

**Supplementary Table 1. Primers used in whole genome amplification and sequencing of SUDV-p and SUDV-GA.**

| Primer Name           | Fragment | Sequence              | Direction | start* | stop* |
|-----------------------|----------|-----------------------|-----------|--------|-------|
| Sudan boneface 1F     | A        | CGGACACACAAAAAGAAAGA  | F         | 1      | 20    |
| Sudan boneface 1R     |          | ATCCCCTGTTGGACTGAAAG  | R         | 542    | 561   |
| Sudan boneface 1R3518 |          | CATTTTCAGCACAACTGCGAT | R         | 3499   | 3518  |
| Sudan boneface 2F     |          | GGCCTTTTCCTAACCTGGCT  | F         | 205    | 224   |
| Sudan boneface 2R     |          | GTCTCCTCTTCGGGCATAGC  | R         | 863    | 882   |
| Sudan boneface 3F     |          | TGGCTTCAGGTTTGAGGTCC  | F         | 763    | 782   |
| Sudan boneface 3R     |          | AGACGTGCAAACGGAGCATA  | R         | 1334   | 1353  |
| Sudan boneface 4F     |          | AGGTCCATGCAGAACAAGGG  | F         | 987    | 1006  |
| Sudan boneface 4R     |          | TTTCAGCCTCAGTAGCAGCC  | R         | 1492   | 1511  |
| Sudan boneface 5F     |          | TATGCTCCGTTTGCACGTCT  | F         | 1334   | 1353  |
| Sudan boneface 5R     |          | GCCGAATCCTCGTAGTCAGG  | R         | 1865   | 1884  |
| Sudan boneface 6F     |          | GGCTGCTACTGAGGCTGAAA  | F         | 1492   | 1511  |
| Sudan boneface 6R     |          | CAACTCCGGCACCTTTTTTCG | R         | 2025   | 2044  |
| Sudan boneface 7F     |          | CCTGACTACGAGGATTCGGC  | F         | 1865   | 1884  |
| Sudan boneface 7R     |          | CGGGTAGGCTTCTTCAAGGG  | R         | 2529   | 2548  |
| Sudan boneface 8F     |          | CAACTGTAGCTCCACCAGCA  | F         | 2262   | 2281  |
| Sudan boneface 8R     |          | TTGCGGTACGGGTATCAACC  | R         | 2846   | 2865  |
| Sudan boneface 9F     | B        | CCCTTGAAGAAGCCTACCCG  | F         | 2529   | 2548  |
| Sudan boneface 9R     | A        | GGCAGCGTCTAGGCTAAGAG  | R         | 3105   | 3124  |
| Sudan boneface 10F    |          | GGTTGATACCCGTACCGCAA  | F         | 2846   | 2865  |
| Sudan boneface 10R    |          | GGGTAGGACTTGGCTTGGTT  | R         | 3248   | 3267  |
| Sudan boneface 11F    |          | CTCTTAGCCTAGACGCTGCC  | F         | 3105   | 3124  |
| Sudan boneface 11R    |          | CTGGAGGTGCTTGTCATGT   | R         | 3599   | 3618  |
| Sudan boneface 12F    |          | CCTGAATCGCAGTTGTGCTG  | F         | 3494   | 3513  |
| Sudan boneface 12R    |          | ATCTTTGGTGACGGTGGGAC  | R         | 4044   | 4063  |
| Sudan boneface 13F    |          | CCAGGATTTGGGACAGCCTT  | F         | 3801   | 3820  |
| Sudan boneface 13R    |          | CAGTCGGCACAGTAACCCTT  | R         | 4459   | 4478  |
| Sudan boneface 14F    |          | GTCCCACCGTCACCAAAGAT  | F         | 4044   | 4063  |

|                       |   |                       |   |      |      |
|-----------------------|---|-----------------------|---|------|------|
| Sudan boniface<br>14R |   | CCACTTACAGCCCTGCTTGA  | R | 4532 | 4551 |
| Sudan boniface<br>15F |   | CTCCCCTGCTTGGTACTATGT | F | 4319 | 4339 |
| Sudan boniface<br>15R |   | TGGTCAGCAATTCCGAGTGG  | R | 4742 | 4761 |
| Sudan boniface<br>16F |   | AAGGGTACTGTGCCGACTG   | F | 4459 | 4478 |
| Sudan boniface<br>16R |   | TTCGGGTGAAATGAGAGCCC  | R | 5069 | 5088 |
| Sudan boniface<br>17F |   | GCTCGCATCCTACACGATCA  | F | 4801 | 4820 |
| Sudan boniface<br>17R |   | ACTGGCGGGTGAATGACAAT  | R | 5391 | 5410 |
| Sudan boniface<br>18F |   | GGGCTCTCATTTACCCGAA   | F | 5069 | 5088 |
| Sudan boniface<br>18R |   | GGTTGATTTGCCAGGAGGGA  | R | 5721 | 5740 |
| Sudan boniface<br>19F |   | CAACCCTCCTGCCAAAATGC  | F | 5540 | 5559 |
| Sudan boniface<br>19R |   | CCCAAAGGCATGGAAAAGGC  | R | 6085 | 6104 |
| Sudan boniface<br>20F |   | GCCTGATTAAGGCCCAACCT  | F | 5895 | 5914 |
| Sudan boniface<br>20R |   | AGCCAGCCTGTCATAGAGGA  | R | 6476 | 6495 |
| Sudan boniface<br>21F | C | CCATGCCTTTGGGTGTTGTG  | F | 6092 | 6111 |
| Sudan boniface<br>21R | B | GGGCCTGTCCAGAAGAACAA  | R | 6719 | 6738 |
| Sudan boniface<br>22F |   | AGGTGCCGCTATGTTCAAA   | F | 6397 | 6416 |
| Sudan boniface<br>22R |   | GACGGCAATGTTGTTTCCCC  | R | 7068 | 7087 |
| Sudan boniface<br>23F |   | ACGTTCTTCAATCACCCCC   | F | 6571 | 6590 |
| Sudan boniface<br>23R |   | CCATGGTCGGTGAGGAACTC  | R | 7229 | 7248 |
| Sudan boniface<br>24F |   | TTCGGACCTGGTTCCAAAGG  | F | 7013 | 7032 |
| Sudan boniface<br>24R |   | GGATTGCATTTACCCGTGGC  | R | 7515 | 7534 |
| Sudan boniface<br>25F |   | GCTCCAGCCAAATCCTGAGT  | F | 7213 | 7232 |
| Sudan boniface<br>25R |   | CAGGATCCTACATGTCCCGC  | R | 7789 | 7808 |

|                       |   |                           |   |       |       |
|-----------------------|---|---------------------------|---|-------|-------|
| Sudan boniface<br>26F |   | GCCACGGGTAAATGCAATCC      | F | 7515  | 7534  |
| Sudan boniface<br>26R |   | AACAAAGCAGCTTGCAGACG      | R | 8006  | 8025  |
| Sudan boniface<br>27F |   | GATGGGGCGGGACATGTAG       | F | 7783  | 7801  |
| Sudan boniface<br>27R |   | CTTGTCGAGGACAGGCTCTT      | R | 8329  | 8348  |
| Sudan boniface<br>28F |   | GGAAAGAGCCTGTCCTCGAC      | F | 8326  | 8345  |
| Sudan boniface<br>28R |   | TGCTTGAAGTCATCAGCCGT      | R | 8828  | 8847  |
| Sudan boniface<br>29F |   | ACTGTCCCTCCAGCACCTAA      | F | 8627  | 8646  |
| Sudan boniface<br>29R |   | TTGCCCAAGTTTTCCCTCC       | R | 9024  | 9043  |
| Sudan boniface<br>30F |   | CTGGCAAATCCTACGGCTGA      | F | 8816  | 8835  |
| Sudan boniface<br>30R |   | AGGAGGGAGCCCTTCATTCA      | R | 9246  | 9265  |
| Sudan boniface3<br>1F |   | GGGTAGTCCTACACGCCCTA      | F | 9764  | 9783  |
| Sudan boniface<br>31R |   | GCTCTAGCTCCCGTTTTGGT      | R | 10334 | 10353 |
| Sudan boniface<br>32F |   | CAAACACCTTGCTCTGCCAA      | F | 9866  | 9885  |
| Sudan boniface<br>32R |   | TCTTAGGCTTGCAAAAGGAGC     | R | 10258 | 10278 |
| Sudan boniface<br>33F |   | CCAAAACGGGAGCTAGAGCA      | F | 10335 | 10354 |
| Sudan boniface<br>33R |   | CTTGACAGGACCAGGGTGTC      | R | 10933 | 10952 |
| Sudan boniface<br>34F | D | GAACGCAACGAGTGAAGGAC      | F | 10708 | 10727 |
| Sudan boniface<br>34R | C | AGATGCTGTGAGTGAAACTGGA    | R | 11370 | 11391 |
| Sudan boniface<br>35F |   | TGTATGATCTCAGTTTAATCTCTCT | F | 11127 | 11151 |
| Sudan boniface<br>35R |   | ACAGGGAGGTTCTAATGGTG      | R | 11806 | 11825 |
| Sudan boniface<br>36F |   | CTAAGAACATGCCGCTTGCC      | F | 11658 | 11677 |
| Sudan boniface<br>36R |   | GCGGACACTGGATCTTCCAA      | R | 12312 | 12331 |
| Sudan boniface<br>37F |   | CGAGGGAGAATGAACCGAGG      | F | 12018 | 12037 |

|                       |   |                        |   |       |       |
|-----------------------|---|------------------------|---|-------|-------|
| Sudan boniface<br>37R |   | GCCCCAGTGCTTTTGGATTG   | R | 12646 | 12665 |
| Sudan boniface<br>38F |   | ATTGGGATCGGAGGGGTACA   | F | 12395 | 12414 |
| Sudan boniface<br>38R |   | TCGGGTACACGTTTGGTGTT   | R | 13071 | 13090 |
| Sudan boniface<br>39F |   | GGCGAAATCAATTCCCACCAC  | F | 12868 | 12888 |
| Sudan boniface<br>39R |   | TCAAAGACATTGCGAACCCCA  | R | 13505 | 13525 |
| Sudan boniface<br>40F |   | GCCTCCTTCACCAAGCATCT   | F | 13348 | 13367 |
| Sudan boniface<br>40R |   | CAGGCACTTGTGACTTTGGC   | R | 13866 | 13885 |
| Sudan boniface<br>41F |   | GGCCACCTTGGTGGTATTGA   | F | 13644 | 13663 |
| Sudan boniface<br>41R |   | GGTCACCCAGGTTGCGATAA   | R | 14300 | 14319 |
| Sudan boniface<br>42F |   | AAGACAGCAGCTAGGATGGC   | F | 13986 | 14005 |
| Sudan boniface<br>42R |   | TCATGACGGGCGTTGAAGAA   | R | 14600 | 14619 |
| Sudan boniface<br>43F | E | GGTGACCCTGTGACTTCAGG   | F | 14313 | 14332 |
| Sudan boniface<br>43R | D | ACATGGCAATGTTGCCCTA    | R | 14920 | 14939 |
| Sudan boniface<br>44F |   | CGAACACCAAGCGGGAAAAG   | F | 14646 | 14665 |
| Sudan boniface<br>44R |   | GCTTAATAGCGGGCTGACCT   | R | 15137 | 15156 |
| Sudan boniface<br>45F |   | CGGTAGACAGTTAATAGGGGCA | F | 14906 | 14927 |
| Sudan boniface<br>45R |   | CAGGTGAATATGAGCCCTGTGA | R | 15554 | 15575 |
| Sudan boniface<br>46F |   | TCCTTTATGGCCAACCGCAT   | F | 15366 | 15385 |
| Sudan boniface<br>46R |   | CCGCTGCTAATGGGATCTGT   | R | 15852 | 15871 |
| Sudan boniface<br>47F |   | GATCCCATTAGCAGCGGTGA   | F | 15855 | 15874 |
| Sudan boniface<br>47R |   | GCGGCAAATGATGTGTGGA    | R | 16514 | 16533 |
| Sudan boniface<br>48F |   | AGCTTTGTTGAGGAGTGGGT   | F | 16209 | 16228 |
| Sudan boniface<br>48R |   | TACTGCGGCTTCTTCAGGG    | R | 16862 | 16881 |

|                            |   |                        |   |       |       |
|----------------------------|---|------------------------|---|-------|-------|
| Sudan boniface<br>49F      |   | CCCAAAAGTAGGTCCACCCC   | F | 16662 | 16681 |
| Sudan boniface<br>49R      |   | TGACCTCTAGCTCACCACGA   | R | 17183 | 17202 |
| Sudan boniface<br>50F      |   | CCCTGAAGAAAGCCGCAGTA   | F | 16862 | 16881 |
| Sudan boniface<br>50R      |   | GCACATCCCATCCAAATCGC   | R | 17422 | 17441 |
| Sudan boniface<br>51F      |   | TCAGGTTACACCACCCAAG    | F | 17133 | 17152 |
| Sudan boniface<br>51R      |   | GAGGGCAAGGTGTCTTGTGA   | R | 17779 | 17798 |
| Sudan boniface<br>52F      |   | GCGATTTGGATGGGATGTGC   | F | 17422 | 17441 |
| Sudan boniface<br>52R      |   | CAGCATCACTCATCCGGTGT   | R | 18074 | 18093 |
| Sudan boniface<br>53F      |   | CTTGCCCTCCTCCAAACTGA   | F | 17790 | 17809 |
| Sudan boniface<br>53R      |   | TCGATGCTTCCAACGCTGTAT  | R | 18290 | 18310 |
| Sudan boniface<br>54F      |   | AACTTATGGACCGGCTCACC   | F | 18100 | 18119 |
| Sudan boniface<br>54R      |   | TATGTTATTCCCACCGGCC    | R | 18623 | 18642 |
| Sudan boniface<br>55F      |   | ATACAGCGTTGGAAGCATCG   | F | 18290 | 18309 |
| Sudan boniface<br>55R      |   | TGTGCGCTTAATTTTCCTGGTG | R | 18810 | 18831 |
| Sudan boniface<br>56F      |   | GGAAGCATCGATTCAAGGT    | F | 18300 | 18318 |
| Sudan boniface<br>56F14652 |   | CCAAGCGGGAAAAGATTACA   | F | 14652 | 14671 |
| Sudan boniface<br>56R      | E | TGGACACACAAAAAAGAGAA   | R | 18856 | 18875 |

\*The position is defined according to the reference sequence FJ968794.1
